# Supplementary material
Source: Springer Nature journal article supplement (https://www.springermedizin.de/resource/supplementary/12957_2011_975_MOESM5_ESM.pdf/9562156)
Supplement: MOESM5 [file 9562156]

End : 1 actcgcagtagccaatttaacaatatgtgcttctacacagttctcctgtacctgggcaatat 60  
|||||  
HPV18: 6621 actcgcagtagccaatttaacaatatgtgcttctacacagttctcctgtacctgggcaatat 6680

End : 61 gatgctaccaaatttaagcagttatagcagacatgt 95  
|||||  
HPV18: 6681 gatgctaccaaatttaagcagttatagcagacatgt 6715

Cervix:1 gcagtagccaatttaacaatatgtgcttctacacagttctcctgtacctgggcaatatgatg 60  
|||||  
HPV18:6625 gcagtagccaatttaacaatatgtgcttctacacagttctcctgtacctgggcaatatgatg 6684

Cervix: 1 ctaccaaatttaagcagttatagcagacatgt 91  
|||||  
HPV18:6685 ctaccaaatttaagcagttatagcagacatgt 6715
